# Supplementary material for: From Price Stability to Food Security: What Are the Drivers of Price Volatilities in Philippine Vegetable Markets?
Source: Research Square preprint supplement (doi:10.21203/rs.3.rs-6876748/v1), 2025-06-27
Supplement: Supplementary file 1 [file 232c1d25ed28bbba5ff950ab.docx]

**Additional file for Simulation results of price variance decompositions (baseline vs simulations)**

**Fig.1** Onion Farm Price Variance Decompositions (Baseline vs Simulations).

**Fig.2** Onion Wholesale Price Variance Decompositions (Baseline vs Simulations).

**Fig.3** Onion Retail Price Variance Decompositions (Baseline vs Simulations).

**Fig.4** Garlic Farm Price Variance Decompositions (Baseline vs Simulations).

**Fig.5** Garlic Wholesale Price Variance Decompositions (Baseline vs Simulations).

**Fig.6** Garlic Retail Price Variance Decompositions (Baseline vs Simulations).
